# Supplementary material for: Bi8Te3, the 11-Atom Layer Member of the Tetradymite Homologous Series
Source: MDPI journal article supplement (doi:10.3390/min11090980), 2021-09-09
Supplement: s1 [file s1]

Archive with 3 entries (3 files):
- 11-layer Supplementary tables.pdf
- Bi8Te3 crystal structure information.pdf
- Supplementary material Figures.pdf
