# Supplementary material for: Bi8Te3, the 11-Atom Layer Member of the Tetradymite Homologous Series
Source: MDPI journal article supplement (doi:10.3390/min11090980), 2021-09-09
Supplement: s1 [file s1 › 11-layer Supplementary tables.pdf]

SUPPLEMENTARY MATERIALS: EPMA METHODOGOLOY

Table S1. EPMA setup for analysis

| Element<br>and Line | Diffracting<br>Crystal (Sp#) | Background<br>type/fit | kV/nA/spot<br>size(μm) | Peak<br>Count<br>Time | Bkgd Count Times (per pt) |    | # bkgd points<br>acquired<br>(Lo/Hi) | Standard | Average DL (99% CI)<br>on<br>sample (ppm) |
|---------------------|------------------------------|------------------------|------------------------|-----------------------|---------------------------|----|--------------------------------------|----------|-------------------------------------------|
|                     |                              |                        |                        |                       | Lo                        | Hi |                                      |          |                                           |
| S Ka                | LPET (1)                     | Multipoint             | 20/20/0                | 15                    | 10                        | 10 | 2/2                                  | 566      | 120                                       |
| Bi Ma               | LPET (1)                     | Multipoint             | 20/20/0                | 15                    | 10                        | 10 | 2/2                                  | 1400     | 640                                       |
| Pb Ma               | LPET (1)                     | Multipoint             | 20/20/0                | 15                    | 10                        | 10 | 2/2                                  | 566      | 660                                       |
| Se La               | TAP (2)                      | Multipoint             | 20/20/0                | 30                    | 15                        | 15 | 1/2                                  | 568      | 370                                       |
| Te La               | LPET (4)                     | Multipoint             | 20/20/0                | 30                    | 15                        | 15 | 0/3                                  | 1400     | 350                                       |
| Sb La               | LPET (4)                     | Multipoint             | 20/20/0                | 30                    | 15                        | 15 | 1/3                                  | 544      | 370                                       |

\* Standard # refers to internal database. Full list of standards in Table S3

Table S2. Standard information

| Reference<br># | Mineral composition | Natural/Synthetic | Manufacturer       |
|----------------|---------------------|-------------------|--------------------|
| 544            | Stibnite            | Natural           | Astimex            |
| 566            | Galena              | Natural           | P&H and Associates |
| 568            | Bismuth Selenide    | Synthetic         | P&H and Associates |
| 1400           | Bismuth Telluride   | Synthetic         | P&H and Associates |
