# Supplementary material for: Bi8Te3, the 11-Atom Layer Member of the Tetradymite Homologous Series
Source: MDPI journal article supplement (doi:10.3390/min11090980), 2021-09-09
Supplement: s1 [file s1 › Bi8Te3 crystal structure information.pdf]

## Crystallographic information file (.cif) for Bi<sub>8</sub>Te<sub>3</sub>

The crystal structure was obtained as follows. We fixed the origin at (0,0,0), i.e, the first atom at (0,0,0) for (x, y, z) fractional coordinates; this atom was assigned to Te. The z coordinate for the second atom was obtained by  $1/N = 1/11 = 0.091$ , and (x,y)=(0,0). The z coordinates for the remaining atoms were obtained by incremental addition of the smallest z value (0.091), whereas keeping the (x,y) coordinates at (0,0). Atoms of equivalent positions were populated by the software according to the symmetry operations within the  $R\bar{3}m$  space group. The z for Bi2 atom separating slabs of 11-atoms was shifted by 0.002 units (0.184 instead of 0.182). The same small shift is reported in ikunolite (Kato 1959), i.e., the z for Bi2 is 0.287 instead of  $0.284 = 2 \times 0.142$  (0.142 is the z for Bi1) for a comparable crystal setting with origin at (0,0,0). The structure reported here requires assessment either by single crystal X-ray methods or *ab initio* calculations using density functional theory.

Kato, A. Ikunolite, a new bismuth mineral from the Ikuno mine, Japan. *Mineral. Journal* **1959**, 2, 397-407.

```
*****
data_Crystal
_audit_creation_method      'generated by CrystalMaker X for Windows'
_cell_length_a              4.400000
_cell_length_b              4.400000
_cell_length_c              63.000000
_cell_angle_alpha           90.000000
_cell_angle_beta            90.000000
_cell_angle_gamma           120.000000

_symmetry_space_group_name_H-M      'R -3 m'
loop_
_symmetry_equiv_pos_as_xyz
'+x,+y,+z'
'-y,+x-y,+z'
'-x+y,-x,+z'
'+y,+x,-z'
'+x-y,-y,-z'
'-x,-x+y,-z'
'-x,-y,-z'
'+y,-x+y,-z'
'+x-y,+x,-z'
'-y,-x,+z'
'-x+y,+y,+z'
'+x,+x-y,+z'
'2/3+x,1/3+y,1/3+z'
'1/3+x,2/3+y,2/3+z'
'2/3-y,1/3+x-y,1/3+z'
'1/3-y,2/3+x-y,2/3+z'
'2/3-x+y,1/3-x,1/3+z'
'1/3-x+y,2/3-x,2/3+z'
'2/3+y,1/3+x,1/3-z'
'1/3+y,2/3+x,2/3-z'
'2/3+x-y,1/3-y,1/3-z'
'1/3+x-y,2/3-y,2/3-z'
'2/3-x,1/3-x+y,1/3-z'
'1/3-x,2/3-x+y,2/3-z'
'2/3-x,1/3-y,1/3-z'
'1/3-x,2/3-y,2/3-z'
'2/3+y,1/3-x+y,1/3-z'
```

'1/3+y,2/3-x+y,2/3-z'  
'2/3+x-y,1/3+x,1/3-z'  
'1/3+x-y,2/3+x,2/3-z'  
'2/3-y,1/3-x,1/3+z'  
'1/3-y,2/3-x,2/3+z'  
'2/3-x+y,1/3+y,1/3+z'  
'1/3-x+y,2/3+y,2/3+z'  
'2/3+x,1/3+x-y,1/3+z'  
'1/3+x,2/3+x-y,2/3+z'

```
loop_  
_atom_site_label  
_atom_site_type_symbol  
_atom_site_occupancy  
_atom_site_fract_x  
_atom_site_fract_y  
_atom_site_fract_z  
Te1  Te 1.0  0.0  0.0  0.0  
Bi1  Bi 1.0  0.0  0.0  0.091  
Bi2  Bi 1.0  0.0  0.0  0.184  
Te2  Te 1.0  0.0  0.0  0.273  
Bi3  Bi 1.0  0.0  0.0  0.364  
Bi4  Bi 1.0  0.0  0.0  0.455
```
